# Supplementary material for: Landscape Changes in the Southern Coalfields of West Virginia: Multi-Level Intensity Analysis and Surface Mining Transitions in the Headwaters of the Coal River from 1976 to 2016
Source: MDPI journal article supplement (doi:10.3390/land10070748), 2021-07-17
Supplement: s1 [file s1]

# Supplementary Materials: Landscape Changes in the Southern Coalfields of West Virginia: Multi-Level Intensity Analysis and Surface Mining Transitions in the Headwaters of the Coal River from 1976 to 2016

## *Land* 2021, X, Article No.

Vincenzo Cribari, Michael P. Strager, Aaron E. Maxwell and Charles Yuill

## Supplementary Materials

**Table S1.** Synoptic table of remote sensing and land change studies concerning surface mining in the Central Appalachian

| Region.                               |                                                                                                                                              |                                                                                                         |                                                                                           |                                                                          |
|---------------------------------------|----------------------------------------------------------------------------------------------------------------------------------------------|---------------------------------------------------------------------------------------------------------|-------------------------------------------------------------------------------------------|--------------------------------------------------------------------------|
| Research                              | Objectives                                                                                                                                   | Main area of interest                                                                                   | Method used                                                                               | Spatial scale of analysis                                                |
| (Slonecker & Berger, 2001) [1]        | Review of remote sensing methods applied to MTM                                                                                              | Area location and extent, geomorphological aspects, land use, vegetation and reclamation, water quality | Literature review.                                                                        | Appalachia, particularly WV and Kentucky.                                |
| Townsend et al. (2009) [2]            | Map extents of surfaces mining and mines reclamation. Land change analysis among three classes                                               | Remote sensing classification and watershed hydrology                                                   | Programmed decision tree in C (with ancillary data, and several spectral index like NDVI) | Eight river basins (not contiguous, two groups)                          |
| Maxwell et al. (2014) [3]             | Comparison of NAIP orthophotography and RapidEye satellite imagery                                                                           | Land cover classification of surface mining reclamation                                                 | Machine learning (RF, SVMs) NAIP and RapidEye data                                        | Hobet-12 mine                                                            |
| Maxwell & Warner (2015) [4]           | Differentiate mine-reclaimed grassland from spectrally similar land covers                                                                   | Mine-reclaimed grasslands                                                                               | GEOBIA and machine learning (RF, SVMs), topographic data as ancillary data                | Three watersheds in southern WV                                          |
| Oliphant et al. (2016) [5]            | Map invasive species                                                                                                                         | Reclaimed mining areas                                                                                  | Machine learning (RF, SVMs) with training data                                            | 567 km <sup>2</sup> , area is inside mining permits only                 |
| Ross, McGlynn, & Bernhardt (2016) [6] | Estimation of the total volumetric and topographic disturbance associated with mining                                                        | Environmental studies, environmental impact of MTR                                                      | Elevation change using historic pre-mining DEM and post-mining DEM                        | ~11 500 km <sup>2</sup> area, southern coalfields of WV                  |
| Pericak et al. (2018) [7]             | Land use classification on a regional scale, correlation with coal production. Technique based on open data and easily accessible technology | Evaluation and trend of surface mining extents in the Central Appalachians Region                       | NDVI calculation with time series and Google Earth Engine                                 | Regional Scale, Central Appalachians, 74 counties, 83000 km <sup>2</sup> |
| Yang et al. (2018) [8]                | How vegetation reclaimed after mining activities. The trend of vegetation recover (integrity index).                                         | Surface mines reclamation                                                                               | NDVI signatures and times series trajectories-based analyses                              | Two counties                                                             |

**Table S2.** The error matrix for the classification of 1976 obtained with the Ranger package in R. Values in the cells represent the number of objects, while accuracies are reported with the percentage of land area.

|                                                 |                  | Reference |                      |                     |                   |                    |       | Row tot.               | User's accuracy %<br>(Commission Errors) |
|-------------------------------------------------|------------------|-----------|----------------------|---------------------|-------------------|--------------------|-------|------------------------|------------------------------------------|
|                                                 |                  | Barren    | Deciduou<br>s forest | Evergreen<br>forest | Low<br>vegetation | Developed<br>areas | Water |                        |                                          |
| Classification                                  | Barren           | 116       | 1                    | 0                   | 0                 | 1                  | 0     | 118                    | 98.3                                     |
|                                                 | Deciduous forest | 13        | 60                   | 0                   | 0                 | 0                  | 0     | 73                     | 82.2                                     |
|                                                 | Evergreen forest | 0         | 0                    | 66                  | 0                 | 0                  | 0     | 66                     | 100.0                                    |
|                                                 | Low Vegetation   | 0         | 2                    | 0                   | 57                | 1                  | 0     | 60                     | 95.0                                     |
|                                                 | Developed areas  | 4         | 0                    | 0                   | 0                 | 55                 | 0     | 59                     | 93.2                                     |
|                                                 | Water            | 0         | 0                    | 0                   | 0                 | 0                  | 26    | 26                     | 100.0                                    |
|                                                 | Column tot       | 133       | 63                   | 66                  | 57                | 57                 | 26    | Overall accuracy 94.5% |                                          |
| Producer's<br>accuracy (%)<br>(Omission Errors) |                  | 87.2      | 95.2                 | 100.0               | 100.00            | 96.5               | 100.0 |                        |                                          |

**Table S3.** The error matrix for the classification of 1996 obtained with the Ranger package in R. Values in the cells represent the number of objects, while accuracies are reported with the percentage of land area.

|                                              |                  | Reference       |                |                         |                         |                       |                    |       |                        |                                          |
|----------------------------------------------|------------------|-----------------|----------------|-------------------------|-------------------------|-----------------------|--------------------|-------|------------------------|------------------------------------------|
|                                              |                  | Barren<br>clear | Barren<br>dark | Decidu<br>ous<br>forest | Evergre<br>en<br>forest | Low<br>vegetatio<br>n | Developed<br>areas | Water | Row<br>tot.            | User's accuracy %<br>(Commission Errors) |
| Classification                               | Barren clear     | 43              | 0              | 0                       | 0                       | 1                     | 10                 | 0     | 54                     | 79.6                                     |
|                                              | Barren dark      | 0               | 39             | 0                       | 0                       | 1                     | 1                  | 0     | 41                     | 95.1                                     |
|                                              | Deciduous forest | 2               | 0              | 48                      | 6                       | 1                     | 1                  | 0     | 58                     | 82.8                                     |
|                                              | Evergreen forest | 0               | 0              | 0                       | 43                      | 0                     | 0                  | 0     | 43                     | 100.0                                    |
|                                              | Low Vegetation   | 0               | 0              | 2                       | 1                       | 47                    | 0                  | 0     | 50                     | 94.0                                     |
|                                              | Developed areas  | 5               | 0              | 0                       | 0                       | 0                     | 34                 | 1     | 40                     | 85.0                                     |
|                                              | Water            | 0               | 11             | 0                       | 0                       | 0                     | 1                  | 49    | 61                     | 80.3                                     |
| Column tot.                                  |                  | 50              | 50             | 50                      | 50                      | 50                    | 47                 | 50    | Overall accuracy 87.3% |                                          |
| Producer's accuracy (%)<br>(Omission Errors) |                  | 86.0            | 78.0           | 96.0                    | 86.0                    | 94.0                  | 72.3               | 98.0  |                        |                                          |

**Table S4.** The error matrix for the classification of 2019, from Maxwell et al. (2019) [9]. Values in the cells represent the number of objects, while accuracies are reported with the percentage of land area.

|  | Reference |        |                |            |                 |       | Row Total | User's Accuracy<br>(Commission Errors) |
|--|-----------|--------|----------------|------------|-----------------|-------|-----------|----------------------------------------|
|  | Barren    | Forest | Low vegetation | Impervious | Mixed developed | Water |           |                                        |

|                                              |                 |      |       |       |       |       |       |                         |       |
|----------------------------------------------|-----------------|------|-------|-------|-------|-------|-------|-------------------------|-------|
| Classification                               | Barren          | 75   | 4     | 41    | 59    | 1     | 5     | 185                     | 37.6% |
|                                              | Forest          | 11   | 20420 | 548   | 50    | 135   | 13    | 21177                   | 98.0% |
|                                              | Low Vegetation  | 63   | 72    | 2452  | 30    | 68    | 0     | 2685                    | 94.0% |
|                                              | Impervious      | 12   | 3     | 20    | 207   | 20    | 14    | 276                     | 78.9% |
|                                              | Mixed Developed | 0    | 45    | 81    | 77    | 292   | 2     | 497                     | 61.7% |
|                                              | Water           | 1    | 17    | 4     | 1     | 1     | 154   | 178                     | 96.4% |
| Column Total                                 |                 | 162  | 20561 | 3146  | 424   | 517   | 188   | Overall Accuracy: 96.7% |       |
| Producer's Accuracy (%)<br>(Omission Errors) |                 | 5.1% | 99.4% | 85.8% | 56.8% | 61.4% | 97.9% |                         |       |

Table S5. Number of training and validation objects for the LC classification of 1976.

| Class name        | number of training objects | number of validation objects |
|-------------------|----------------------------|------------------------------|
| Barren            | 194                        | 133                          |
| Deciduous Forest  | 386                        | 63                           |
| Evergreen forest  | 131                        | 66                           |
| Low Vegetation    | 113                        | 57                           |
| Developed areas   | 122                        | 57                           |
| Water             | 25                         | 26                           |
| Total # of points | 971                        | 402                          |

Table S6. Number of training and validation objects for the LC classification of 1996.

| Class name        | number of training objects | number of validation objects |
|-------------------|----------------------------|------------------------------|
| Barren clear      | 104                        | 50                           |
| Barren dark       | 62                         | 50                           |
| Deciduous Forest  | 456                        | 50                           |
| Evergreen forest  | 128                        | 50                           |
| Low Vegetation    | 67                         | 50                           |
| Developed areas   | 73                         | 47                           |
| Water             | 152                        | 50                           |
| Total # of points | 1042                       | 347                          |

Table S7. Number of training and validation objects for the LC classification of 2016.

| Class name      | number of training objects | number of validation objects |
|-----------------|----------------------------|------------------------------|
| Forest          | 13347                      | 20561                        |
| Low Vegetation  | 13353                      | 3146                         |
| Barren          | 1056                       | 162                          |
| Water           | 1098                       | 188                          |
| Impervious      | 1205                       | 424                          |
| Mixed Developed | 1022                       | 517                          |

|                   |       |       |
|-------------------|-------|-------|
| Total # of points | 31081 | 24998 |
|-------------------|-------|-------|

**Table S8.** The quantities derived from the three land cover classifications used in the land-change analysis after the post-processing phase. Quantities are expressed in hectares and cells values (square meters).

| Classes         | 1976      |         | 1996      |         | 2016      |         |
|-----------------|-----------|---------|-----------|---------|-----------|---------|
|                 | cells     | Ha      | cells     | Ha      | cells     | Ha      |
| Forest          | 485084244 | 48508.4 | 511458142 | 51145.8 | 511706592 | 51170.7 |
| Low vegetation  | 61618287  | 6161.8  | 35552080  | 3555.2  | 42749707  | 4275    |
| Barren          | 25324948  | 2532.5  | 22099261  | 2209.9  | 16007616  | 1600.8  |
| Water           | 2740910   | 274.1   | 3217569   | 321.8   | 3255575   | 325.6   |
| Developed areas | 11842685  | 1184.3  | 14284295  | 1428.4  | 12891884  | 1289.2  |

### Example of the process of establishment and abandonment of the settlement of Montcoal during the interval 1912–2016.

By way of example, the process of establishment and abandonment of the settlement of Montcoal during the interval 1912–2016 is reported in Figures S1–S2 together with some detailed images derived by the LC maps. The settlement was established with the opening of a mine in Montcoal Mountain in 1916; it was one of the leading coal towns [10] founded in the Coal River's headwaters [11]. Figures S1–S2 are exemplificative of the land-change processes; they also present the LCCs on a more detailed scale.

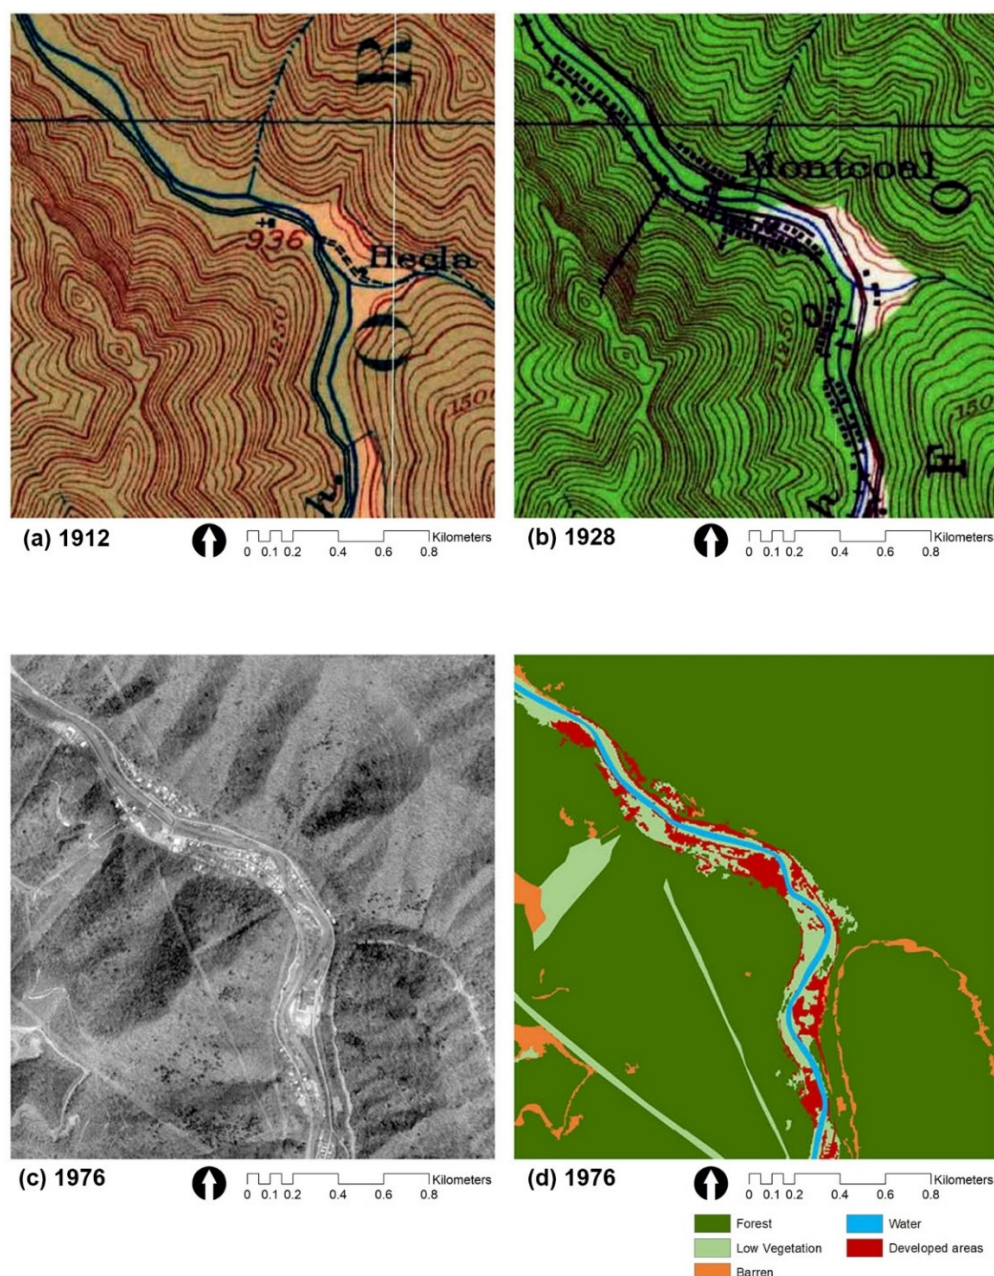

**Figure S1.** Comparison of historical maps, orthoimages, and LC maps. (a) part of the USGS 1:62500 Quadrangle for Bald Knob, WV 1912; (b) part of the USGS 1:62500 Quadrangle for Bald Knob, WV 1928; (c) part of the orthomosaic derived from 1976–1977 USGS aerial images; (d) a detail of the landcover produced for 1976.



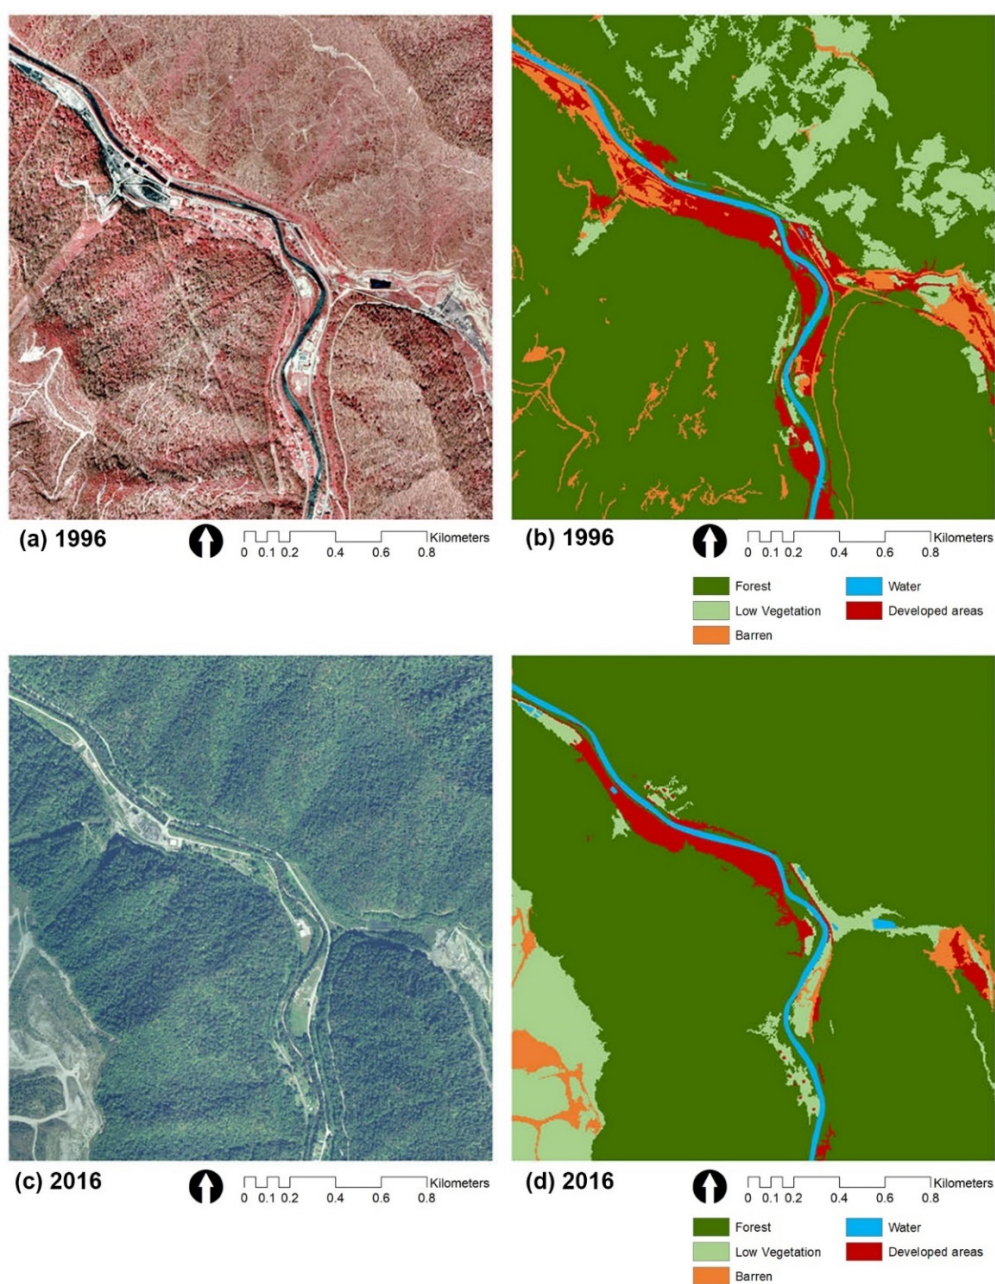

**Figure S2.** Comparison of historical maps, orthoimages, and LC maps (a) part of the DOQ NIR of 1996 mosaic; (b) part of the classification of 1996; (c) NAIP image of 2016; (d) detail of the land cover of 2016.

## Comparison of surface mining extents

The following section presents a comparison of the overall estimation of surface mining areas derived from this study with the findings of Pericak et al. (2018) [7]. The surface mining areas based on the SkyTruth data were derived from the cumulative yearly dataset from 1976 to 2016 [7]. These data were combined in three time-points to allow the comparison with the data used in this study.

The surface mining areas derived from the three LCCs produced in this study were combined, adopting the following criteria. The surface mines from 1976 LCC coincided with the overall size of barren land. For the mining areas of 1996, only the barren and the low vegetation LC classes inside the mining permits were considered; the data obtained were overlaid with the barren land from 1976. For the 2016 data, barren and low vegetation classes were considered only for areas inside the mining permits. This dataset was overlaid with the cumulative set derived from 1996.

The results suggested that the SkyTruth study generally underestimated the surface mining extents derived before 1977, probably because the thin strip-minings patterns were hardly detectable by the early Landsat satellites. This hypothesis is coherent with the limitations authors declared in their findings for the data before 1985. For 1996, when excluding the amount of mining areas derived from the previous dataset of 1976, the quantities estimated in the two studies are very similar with a difference of about 26 hectares. For 2016, when excluding the amount of mining areas derived from the previous dataset of 1996, the SkyTruth is larger; it is worth mentioning that their data are not limited to mining permits. Compared with the SkyTruth data, the findings in this study reported a 39% increase of the overall disturbed land mainly derived from pre-SMCRA surface mine; it corresponds to a difference of 1708.8 hectares (Table S7, Figure S3). The region's mining history suggests that similar findings can be expected in the neighboring watersheds, specifically the WV coal counties and the central Appalachian coalfields, where MTM operations are spread out. Overall conclusions imply it should be reasonable to expect an amount of historically disturbed land in the Central Appalachia region more extensive than the one measured by Pericak et al. (2018) [7].

**Table S9.** Comparison of the overall surface mining areas.

| Hectares of surfaces mining |        |        |        |
|-----------------------------|--------|--------|--------|
|                             | 1976   | 1996   | 2016   |
| Current study               | 2514.2 | 3689.9 | 6096.9 |
| SkyTruth                    | 154.0  | 1303.8 | 4388.1 |
| Difference                  | 2360.2 | 2386.0 | 1708.8 |

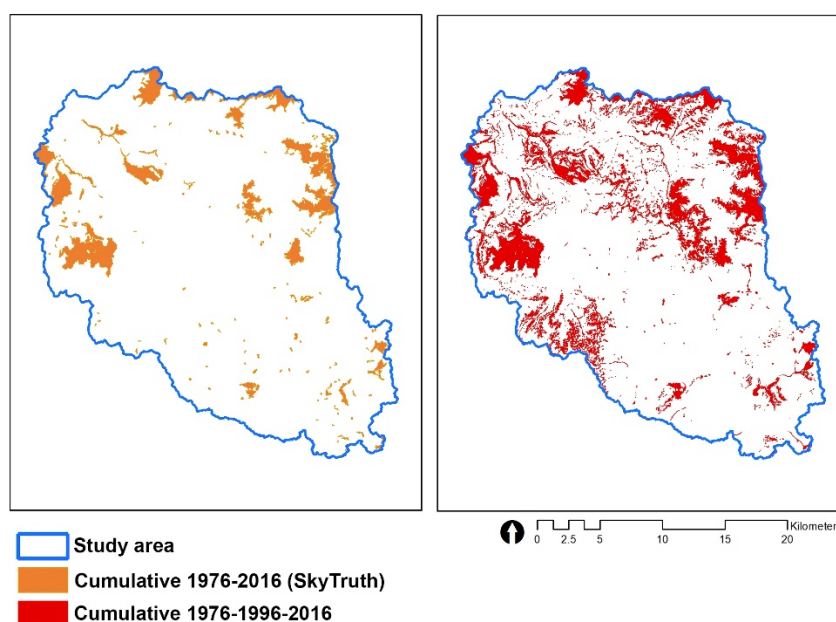

Figure S3. Comparison of the distribution of the two cumulative datasets.

## References

1. Slonecker, E.T.; Benger, M.J. Remote sensing and mountaintop mining. *Remote Sens. Rev.* **2001**, *20*, 293–322, doi:10.1080/02757250109532440.
2. Townsend, P.A.; Helmers, D.P.; Kingdon, C.C.; McNeil, B.E.; de Beurs, K.M.; Eshleman, K.N. Changes in the extent of surface mining and reclamation in the Central Appalachians detected using a 1976–2006 Landsat time series. *Remote Sens. Environ.* **2009**, *113*, 62–72, doi:10.1016/j.rse.2008.08.012.
3. Maxwell, A.E.; Strager, M.P.; Warner, T.A.; Zégre, N.P.; Yuill, C.B. Combining RapidEye Satellite Imagery and Lidar for Mapping of Mining and Mine Reclamation. *GIScience Remote Sens.* **2014**, *51*, 301–320, doi:10.1080/15481603.2014.912874.
4. Maxwell, A.E.; Warner, T.A. Differentiating mine-reclaimed grasslands from spectrally similar land cover using terrain variables and object-based machine learning classification. *Int. J. Remote Sens.* **2015**, *36*, 4384–4410, doi:10.1080/01431161.2015.1083632.
5. Oliphant, A.J.; Wynne, R.H.; Zipper, C.E.; Ford, W.M.; Donovan, P.F.; Li, J. Autumn olive (*Elaeagnus umbellata*) presence and proliferation on former surface coal mines in Eastern USA. *Biol. Invasions* **2017**, *19*, 179–195, doi:10.1007/s10530-016-1271-6.
6. Ross, M.R.V.; McGlynn, B.L.; Bernhardt, E.S. Deep Impact: Effects of Mountaintop Mining on Surface Topography, Bedrock Structure, and Downstream Waters. *Environ. Sci. Technol.* **2016**, *50*, 2064–2074, doi:10.1021/acs.est.5b04532.
7. Pericak, A.A.; Thomas, C.J.; Kroodsma, D.A.; Wasson, M.F.; Ross, M.R. V; Clinton, N.E.; Campagna, D.J.; Franklin, Y.; Bernhardt, E.S.; Amos, J.F. Mapping the yearly extent of surface coal mining in Central Appalachia using Landsat and Google Earth Engine. *PLoS One* **2018**, *13*, 1–15, doi:10.1371/journal.pone.0197758.
8. Yang, Z.; Li, J.; Zipper, C.E.; Shen, Y.; Miao, H.; Donovan, P.F. Identification of the disturbance and trajectory types in mining areas using multitemporal remote sensing images. *Sci. Total Environ.* **2018**, *644*, 916–927, doi:10.1016/j.scitotenv.2018.06.341.
9. Maxwell, A.E.; Strager, M.P.; Warner, T.A.; Ramezan, C.A.; Morgan, A.N.; Pauley, C.E. Large-



- area, high spatial resolution land cover mapping using random forests, GEOBIA, and NAIP orthophotography: Findings and recommendations. *Remote Sens.* **2019**, *11*, doi:10.3390/rs11121409.
10. Shifflett, C.A. *Coal Towns: Life, Work, and Culture in Company Towns of Southern Appalachia, 1880–1960*; The University of Tennessee Press, 1991;
  11. Hufford, M. Landscape and History at the Headwaters of the Big Coal River Valley: An Overview. *Tending Commons Folk. Landsc. South. West Virginia. Am. Folk. Center, Libr. Congr.* **2007**.
